# Supplementary material for: Efficient dye-sensitized solar cell with a pure thin film of a hybrid polyoxometalate covalently attached organic dye as a working electrode in a cobalt redox mediator system
Source: Royal Society of Chemistry journal article supplement (doi:10.1039/c5ra09104g), 2015-01-01
Supplement: c5ra09104g1.pdf [file c5ra09104g1.pdf]

## Supporting Information

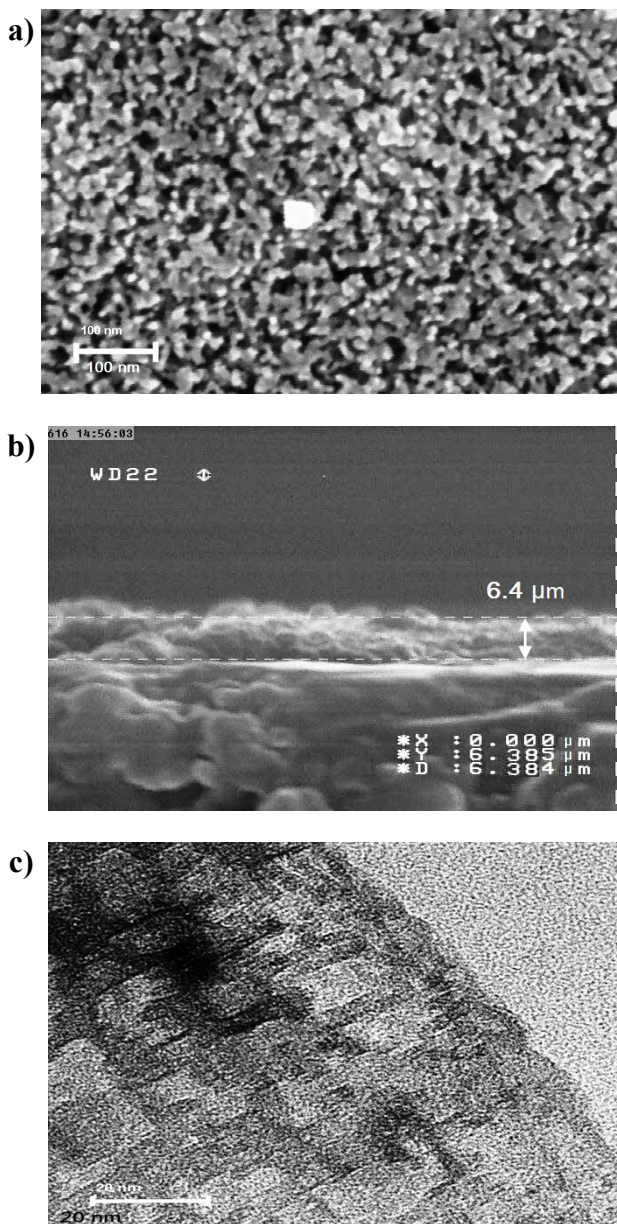

**Figure S1:** FE-SEM images from top (a) and cross section (b) of Hybrid-POM film. TEM image from Hybrid-POM nanoparticles.

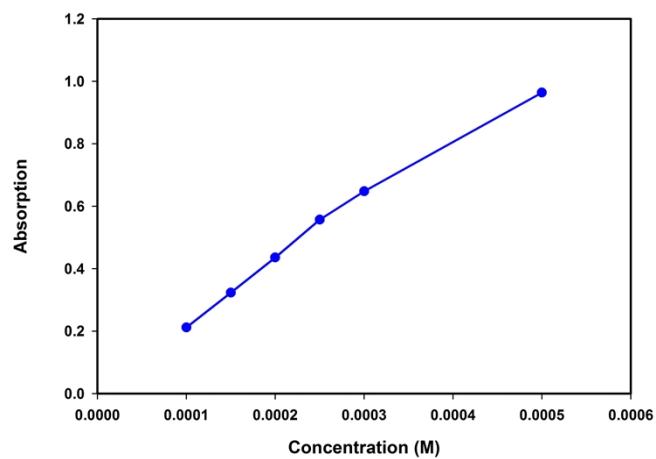

**Figure S2:** linear relation between dye concentration and absorption

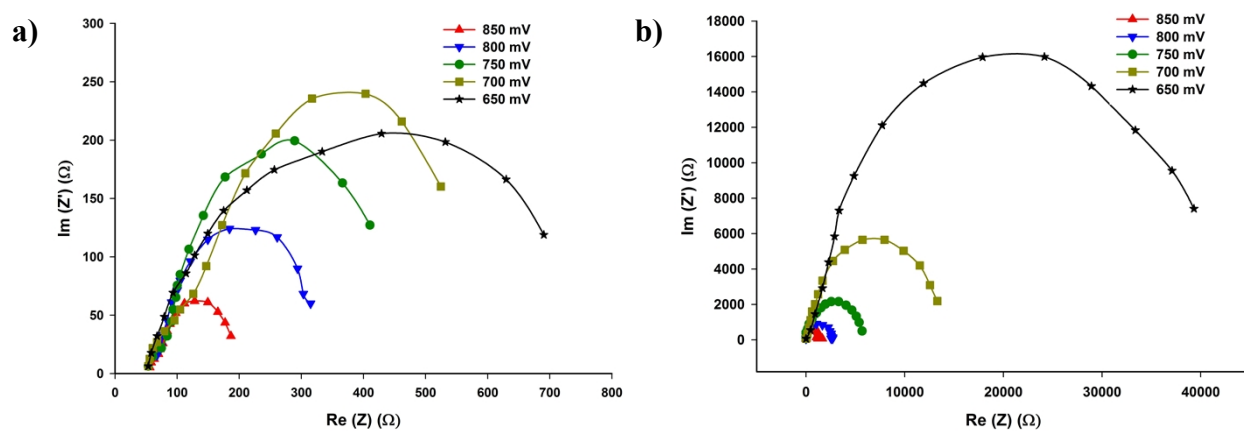

**Figure S3:** Nyquist EIS plots of DSCs with mp-TiO<sub>2</sub> (a) and Hybrid-POM (b), in the dark and different bias potentials.
